# Supplementary material for: Flexible free-standing hydrogen-treated titanium dioxide nanowire arrays as a high performance anode for lithium ion batteries
Source: Royal Society of Chemistry journal article supplement (doi:10.1039/c4ta03495c), 2014-01-01
Supplement: c4ta03495c1.pdf [file c4ta03495c1.pdf]

## Supporting Information

### Flexible Free-Standing Hydrogen-treated Titanium Dioxide Nanowire Arrays as High Performance Anode for Lithium Ion Batteries.

Yi Liu,<sup>a,\*</sup> Chunjie Liu,<sup>a</sup> Jianle Li,<sup>a</sup>

<sup>a</sup> School of Chemistry and Chemical Engineering, GuangDong Pharmaceutical University,

Guangzhou 510006, China

E-mail: [liuyi915@126.com](mailto:liuyi915@126.com)

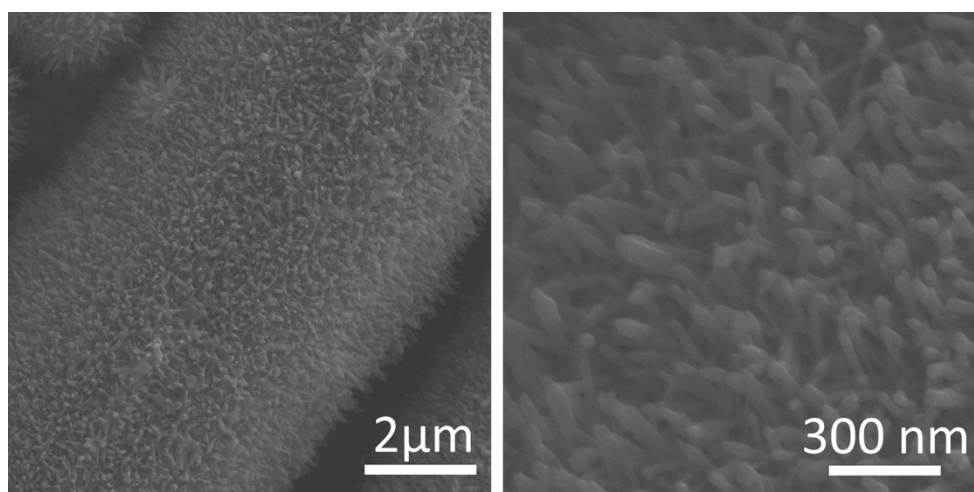

**Figure S1.** SEM images of the TiO<sub>2</sub> before annealing

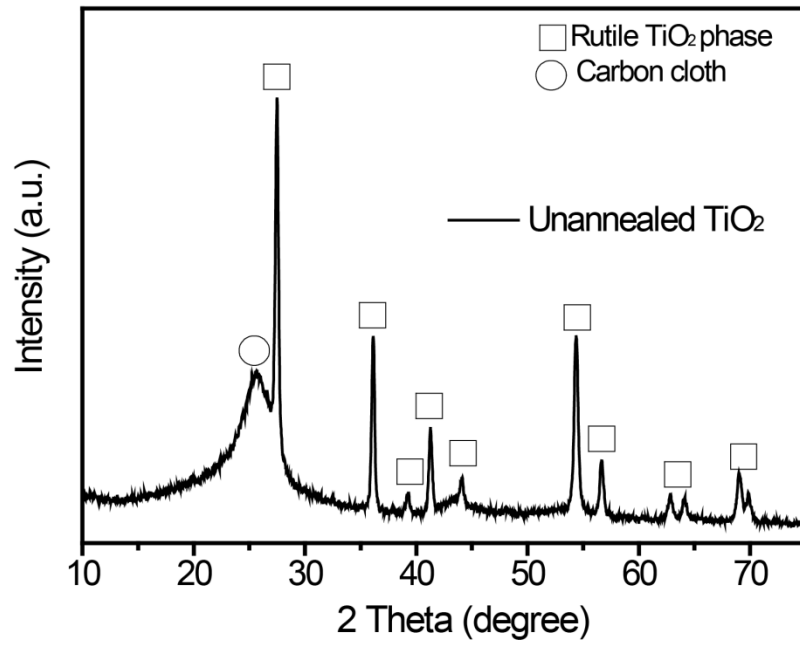

**Figure S2.** XRD spectrum of  $\text{TiO}_2$  sample before annealing. The peaks labeled by square frame can be ascribed to the Rutile  $\text{TiO}_2$  phase (JCPDS #21-1276).

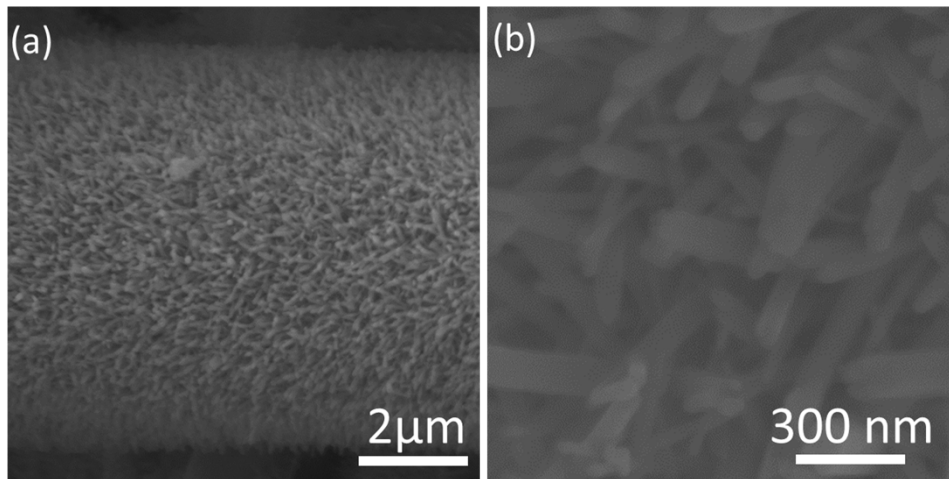

**Figure S3.** (a) SEM image of Air- $\text{TiO}_2$  nanowire arrays. (b) Magnified SEM image of Air- $\text{TiO}_2$  nanowire arrays grown on a carbon fiber.

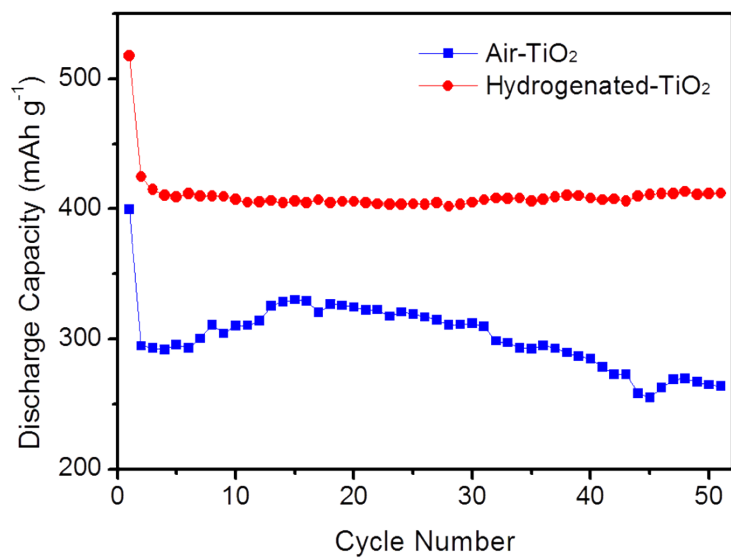

**Figure S4.** Cyclic performance of the samples at 1 C for 50 cycles.

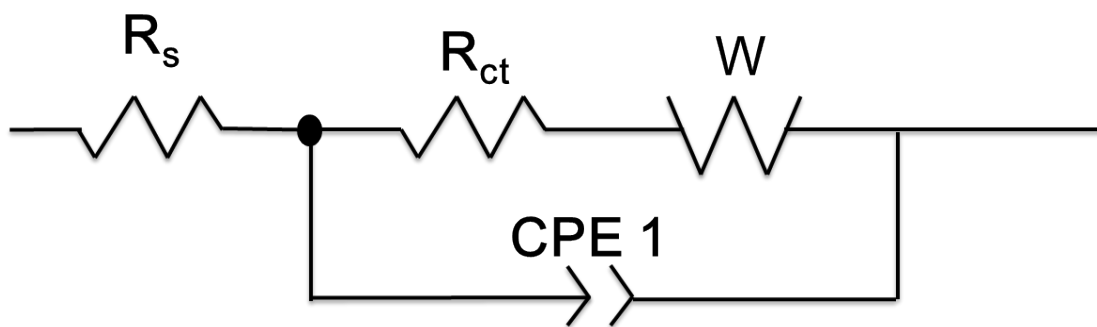

**Figure S5.** The equivalent circuit of the Nyquist plot of the electrodes.
